# Supplementary material for: Evaluating Medicinal Plants for Anticancer Activity
Source: Hindawi journal article supplement (doi:10.1155/2014/721402), 2014-01-01

**Figure S1: Effect of various whole plants extracts on growth of human tumor and healthy control cell lines**

**A-C:** Whole plant extracts (ethanol extracted) were prepared, coded as plant extracts no's 1-17 and tested for their potential as anti-cancer reagents. Various human tumor or control, healthy cell lines (Table 1;  $10^5$  cells/100  $\mu$ l) were grown with 3 mg/ml (final concentration) of the various whole plant extracts for 72 h, after which cell viability was determined as described in Materials and Methods. Results are expressed as percentage of death caused by each plant extract as compared to control cells (treated with DMSO/PBS at the same concentration as the plant extracts). Each column represents one representative out of 2–4 independent experiments performed.

Figure S1

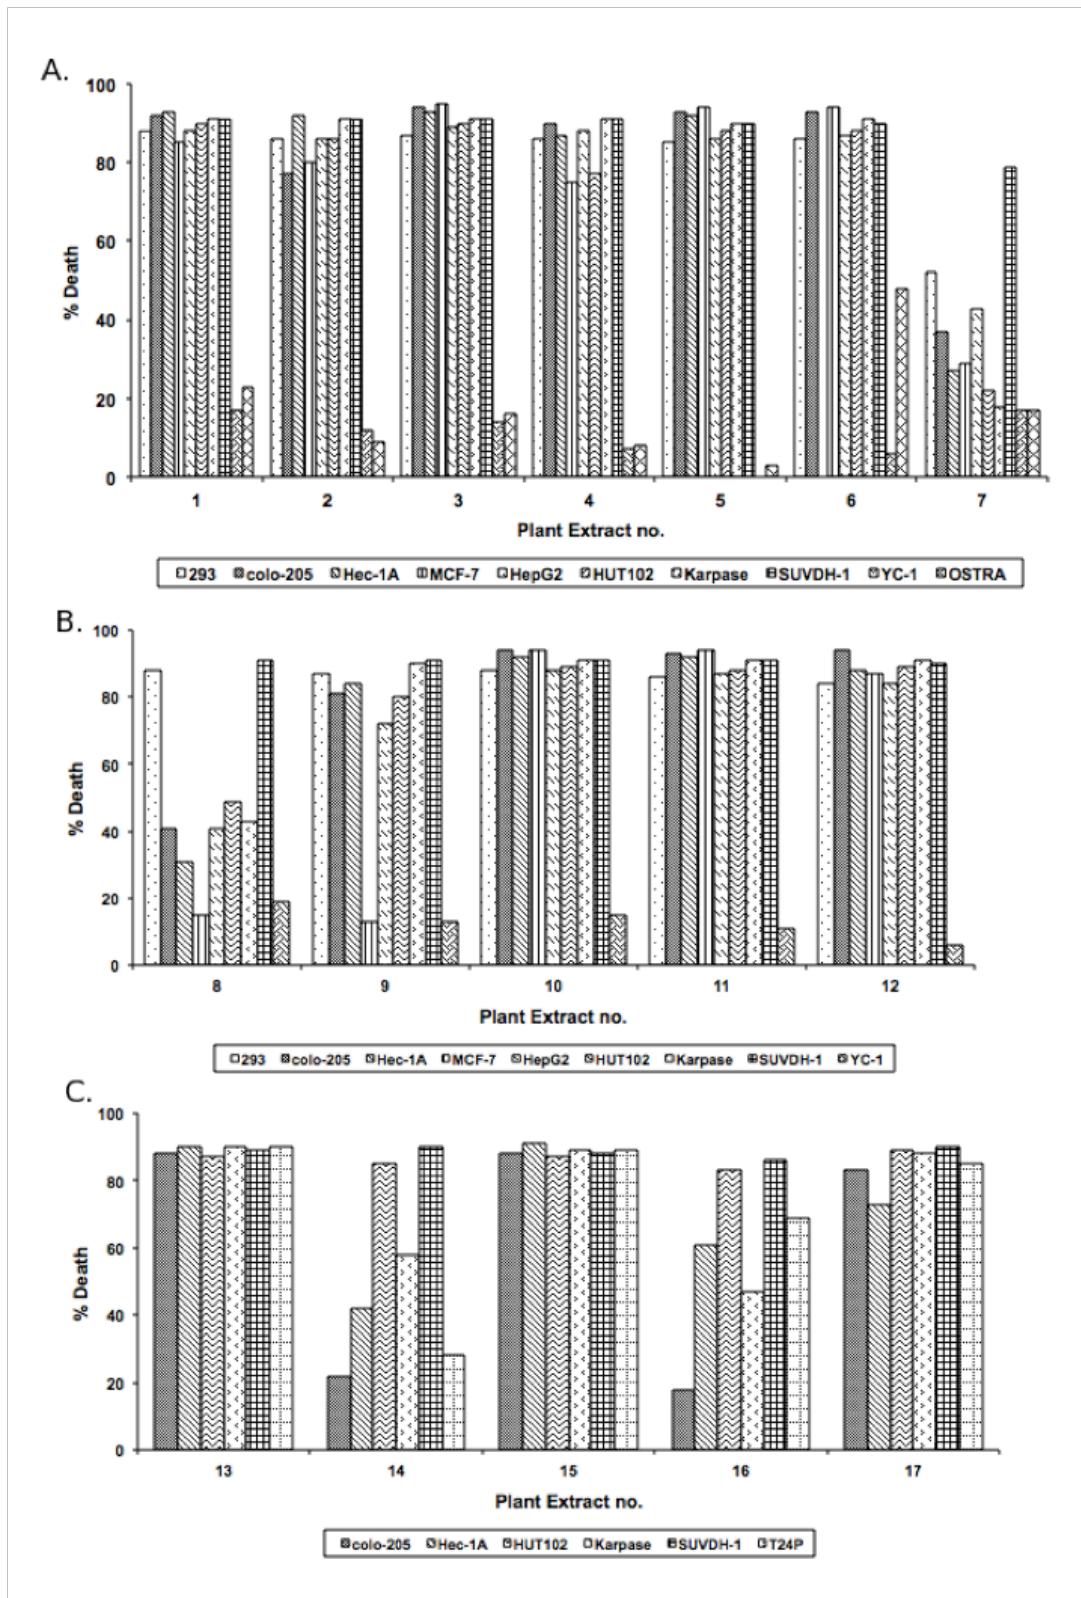

Supplement: f1 [file 721402.f1.pdf]
